# Supplementary material for: Facile Quantification and Identification Techniques for Reducing Gases over a Wide Concentration Range Using a MOS Sensor in Temperature-Cycled Operation
Source: MDPI journal article supplement (doi:10.3390/s18030744), 2018-03-01
Supplement: s1 [file s1]

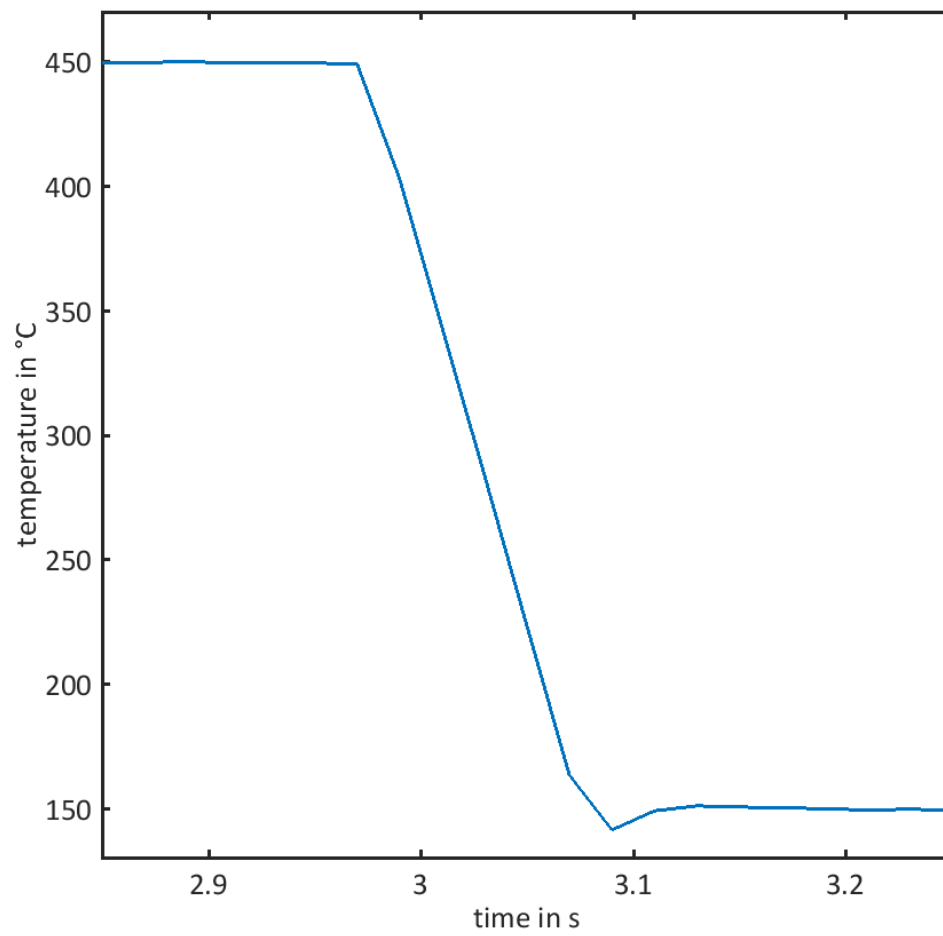

Figure S1: Heater temperature calculated from the heater resistance around the temperature step from 450 °C to 150 °C.
